# Supplementary material
Source: HighWire-hosted journal article supplement (http://ajnr-stage2.highwire.org/highwire/filestream/74566/field_highwire_adjunct_files/0/19-01142.pdf)
Supplement: 19-01142.pdf [file 19-01142.pdf]

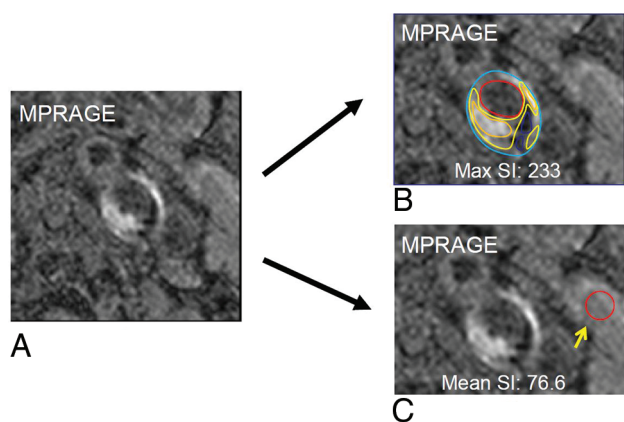

**ON-LINE FIGURE.** The ROI placement in IPH and the adjacent muscle on MPRAGE images. Original (A) and segmented (B) images are shown. The segmented image (B) demonstrates IPH (*orange contours*). C, The ROI (*red circle*) is drawn to enclose the adjacent muscle (*yellow arrow*). The maximum (max) signal-intensity (SI) of IPH and the mean SI of the adjacent muscle are automatically calculated using the custom-designed software.
